# Supplementary material for: Nurse educators perceptions of simulation teaching in Chinese context: benefits and barriers
Source: PeerJ. 2021 Jun 17;9:e11519. doi: 10.7717/peerj.11519 (PMC8214848; doi:10.7717/peerj.11519)
Supplement: Supplemental Information 1 [file peerj-09-11519-s001.xlsx]

## Sheet: Recovered_Sheet1
ID	Age	Sex（F=1，M=2）	Education（UB=1，B=2，M=3，D=4）	student level（	working experiences（year）	time since knowing simulation	training experience （No=0，Yes=1）	use simulation（yes=1,no=0)	times of use	facilitator and barrier 1	facilitator and barrier 2
1	38	1	3	BSN	8	6	0	1	3	NULL	The number of students is too large and the number of class hours is not enough, which makes it impossible to complete one
2	32	1	2	BSN	5	4	0		1	NULL	NULL
3	30	1	3	BSN	1	1	1	1	1	First attempt,need experience	How to use it well, especially for disaster nursing professionals
4	30	1	2	MSN	20	5	0	1	10	NULL	NULL
5	34	1	2	MSN	12	8	0	1	10	The basic conditions of unit simulation are not good, and many things are very limited	Insufficient materials
6	35	1	3	BSN	8	3	1	1	0	NULL	NULL
7	34	1	3	BSN	11	8	0	1	6	After all, the simulation is different from the real person. For example, the students reacted during venipuncture.	Preparation of case, model application
8	58	1	1	BSN	13	2	0	1	10	NULL	NULL
9	30	1	3	BSN	1	1	0	1	15	The teacher team lacks training and each teaching method is different	The cooperation of the students, the teacher’s understanding of the simulation teaching is different and cannot
10	43	1	4	BSN	21	10	1	1	50	The effect is very good, mainly teachers and case library	Need high-quality teachers, continuously updated case library
11	45	1	3	BSN	20	1	0	1	20	Students’ initiative, lack of experience, and lack of teachers	Time
12	43	1	3	BSN	10	2	0	1	2	NULL	Software management
13	29	1	3	Other	2	1	1	1	2	NULL	NULL
14	27	1	3	BSN	2	1	1	1	60	Students are more motivated, but sometimes stay focused on the model	Equipment perfection, case design, process control
15	32	1	3	BSN	10	5	0	1	5	NULL	The number of students is large and the case design is reasonable
16	33	1	3	BSN	10	9	1	1	3	Students like it better, the effect is good, time-consuming and labor-intensive	Many students
17	54	2	2	BSN	32	2	1	1	20	NULL	NULL
18	35	1	2	other	2	1	0	1	2	NULL	NULL
19	28	1	3	other	3	0	0	1	4	High demands on students, some students do not respond well and cannot be flexible	Need a lot of free time to guide students
20	40	1	3	other	15	2	0	0	0	NULL	Have not received system training, lack of self-confidence
21	33	1	3	other	7	3	0	1	5	NULL	Case editor
22	40	1	2	other	16	10	0	1	100	Basic nursing students have little medical foundation and have difficulty understanding.	The student's foundation is weak, the case design
23	36	1	3	BSN	13	0.5	0	1	8	Students spend a lot of time preparing, and some students feel more involved	Time-consuming teaching and insufficient space for personnel
24	26	1	3	BSN	1	1	0	1	3	Time selection should be done after students have completed all relevant knowledge	Case design
25	32	1	2	other	10	5	0	1	40	NULL	NULL
26	45	1	4	BSN	14	0	0	0	0	NULL	NULL
27	30	1	2	other	2	2	0	1	10	NULL	NULL
28	27	1	2	BSN	3	1	1	1	0	Lack of experience to know that the student has completed the learning goal, but learning	Unskilled
29	32	1	3	other	5	0	0	0	0	NULL	How to find the entry point between simulated teaching and the courses taught
30	32	1	2	other	9	2	0	0	0	NULL	Curriculum control needs to be improved
31	25	1	2	BSN	2	1	0	1	6	In the simulation teaching, the students’ cooperation is insufficient. Every time before the class	Case design, guide students
32	26	2	2	BSN	3	2	1	1	15	Students enjoy it, the team consciousness is not clear, the division of labor is unreasonable	Case writing and finalization communication of simulation teaching and guiding reaction
33	53	1	2	other	29	0	1	0	3	NULL	Teacher’s teaching design and classroom guidance and organization
34	45	1	1	BSN	10	3	0	1	10	NULL	NULL
35	54	1	3	BSN	33	0	0	0	0	NULL	Support among teachers, ample class hours, case design
36	27	1	2	other	1	1	1	1	3	Teacher preparation and student preparation are very important	Case design
37	25	1	2	other	3	1	0	1	3	Case design should be adequate	Control the operation of each role, how to control the scene
38	36	1	2	other	1	0	0	1	3	NULL	NULL
39	25	1	2	BSN	#NULL!	1	1	1	6	some practice is not suitable to simulation	Participants are sometimes not motivated, case design
40	27	1	2	BSN	2	0.5	1	0	0	lack of experiences	No real experience
41	48	1	2	other	2	2	0	#NULL!	#NULL!	Simulators cannot be personalized, and students have insufficient experience	Students lack emergency response capabilities
42	35	1	3	BSN	11	1	0	0	0	Students have different abilities, and they tend to get tired later	Insufficient experience, poor time management
43	35	1	3	BSN	10	1	1	1	5	NULL	NULL
44	36	1	2	BSN	12	3	1	1	4	Positive students can learn a lot, negative students don’t learn much	Not enough class hours, some students are not active
45	35	1	2	BSN	12	0.5	1	1	1	Promote students' independent learning and promote teachers' exposure to multi-disciplinary knowledge	Case design
46	43	1	1	BSN	23	0.5	1	1	1	Facilitate teachers' involvement in multi-disciplinary clinical knowledge and organizational skills	Case design, timing
47	52	1	3	BSN	15	5	1	1	5	NULL	Case writing
48	33	1	3	BSN	9	2	0	1	2	Different abilities of students affect discussion, and differences in abilities lead to failure to find	Not conducive to the integration of knowledge, lack of teachers, lack of experimental centers
49	46	1	2	other	20	15	1	1	100	The use of simulated equipment does not achieve the expected results	Computer technology cannot meet the teaching needs, and the strength of the teacher team is not
50	30	1	2	other	1	1	0	1	100	Stimulate student interest	How the actual case
51	31	1	3	other	6	5	1	1	50	Student participation is high to improve teaching quality;	The use of high-end information simulation equipment will secure limited resources
52	49	1	2	BSN	15	10	1	1	50	Students respond positively, and the operation skills are easy to master, and communication is improved	Case design
53	45	1	2	other	5	0.5	1	#NULL!	#NULL!	Students are very interested; insufficient preparation before class	Curriculum setting
54	51	1	2	BSN	3	0.5	0	1	#NULL!	NULL	NULL
55	40	1	3	other	5	5	0	0	#NULL!	Difficult to expand widely, the investment is relatively large, and the teacher structure is limited.	Large number of students, limited hours and insufficient resources
56	43	1	2	other	19	10	1	1	2	NULL	NULL
57	51	1	2	other	33	5	0	1	200	NULL	NULL
58	35	1	2	BSN	10	2	0	1	157	Lack of cooperative training	The simulation teaching tutorials are updated slowly and insufficient funds
59	29	1	3	BSN	1	1	0	1	5	Generally, students are not active during the use of the simulator,	The quality of the simulator is not good and the expected effect is not achieved; the funds are not
60	39	1	2	BSN	2	0	0	1	10	Inadequate nurse-patient communication training	Case design, training according to the level of students
61	43	1	2	other	2	0	0	1	4	NULL	Case design
62	33	1	3	other	6	3	1	1	2	The hardware needs to be improved, and the teaching effect in small classes is good	Can it completely replace classroom teaching
63	40	1	2	other	15	5	0	1	5	Heavy preparation	Case design
64	33	1	3	BSN	11	0	1	1	6	Students have different proficiency levels, unreasonable team division of labor, waste of time	Case design
65	44	1	2	other	22	5	1	1	8	Not proficient for the first time, nurse-patient communication after repeated practice, theoretical knowledge	High cost, few opportunities for students to experience
66	32	1	2	other	9	9	1	1	100	Students feel embarrassed when using model people, and standardized patients are in need	SP training
67	33	1	2	other	10	8	0	1	3	Stimulate students' interest, lack of interaction, lack of teamwork	Large number of students, difficult implementation and insufficient teachers
68	57	1	2	MSN	26	20	1	1	30	NULL	How to implement high simulation simulation teaching, case writing
69	28	1	3	BSN	2	0.5	1	1	4	Student participation in the discussion session is not high	Insufficient clinical experience
70	34	1	3	other	10	10	0	1	200	NULL	NULL
71	45	1	2	other	5	3	0	1	50	Lack of experience	Classroom design
72	40	1	3	BSN	15	1	0	1	3	Teachers need to be improved, and the functions of high-simulation simulators should be used more	Case writing, classroom organization, student preparation
73	33	1	3	BSN	11	1	1	1	2	Continuously guide students, limited teamwork ability	Case design
74	25	1	2	BSN	1.5	0.5	0	0	0	Insufficient response from students, case design needs continuous improvement	Case design
75	33	1	3	BSN	8	2	1	1	1	Case operation is difficult to control, case design is difficult,	Case design, guiding feedback
76	40	1	3	BSN	5	3	1	1	1	Stimulate student interest	Case design, guiding feedback
77	27	1	2	other	1	0.5	1	0	0	NULL	Course design, case writing
78	37	1	3	BSN	4	0.5	1	0	0	NULL	Investment in capital equipment, training professional teachers
79	39	1	3	BSN	11	11	0	1	2	NULL	Lack of simulation teaching tools
80	35	1	3	BSN	9	9	1	1	8	Students should understand the importance of simulation teaching	Case design
81	40	1	3	BSN	15	0	0	1	1	How to inspire students' interest	Construction of hardware facilities
82	43	1	3	BSN	15	10	1	1	48	Most students prefer it, some students find it troublesome	Standardized patient training
83	33	1	3	BSN	10	1	0	0	0	NULL	Real use
84	32	1	2	MSN	11	3	1	1	4	NULL	NULL
85	33	1	3	other	2	1	1	0	1	NULL	The cooperation of multidisciplinary teams is difficult to achieve, which truly reflects the clinical field
86	26	1	2	other	3	2	0	1	0	Improve nursing skills and stimulate learning	Does not have the ability to simulate teaching
87	34	1	3	BSN	10	10	0	1	100	Through the operation of nursing operations under objective conditions in the laboratory	Teaching molds are not intelligent enough and not convenient to use
88	33	1	3	BSN	8	8	0	1	10	Group teaching is required, teachers are demanding, and case design is	Large number of students, insufficient teachers
89	28	1	3	BSN	3	3	0	1	5	The importance of teacher teamwork, the importance of students' independent learning,	How to set up cases and how to carry out simulation teaching
90	46	1	3	BSN	23	7	1	1	5	NULL	Insufficient class hours
91	44	1	2	other	5	0	1	0	1	NULL	Teachers must have the meaning and philosophy of simulation teaching
92	32	1	2	other	1	1	0	1	1	Insufficient critical thinking of students and failure to prepare well in class	Let students participate more actively in simulated teaching
93	31	1	3	other	8	8	0	1	100	Improved compared to traditional teaching, high simulation patient utilization	Teachers' flexible use of simulation teaching
94	30	1	2	BSN	4	1	0	1	6	NULL	All challenges
95	35	1	3	other	16	10	0	1	10	Mobilize students' enthusiasm and participation, which is conducive to the consolidation of knowledge	Heavy workload and insufficient education experience
96	32	1	3	other	6	4	1	1	4	Student response is better than general teaching	Teacher team formation and cooperation need training
97	35	1	3	MSN	9	2	1	0	0	NULL	NULL
98	33	1	3	BSN	8	2	0	1	4	NULL	NULL
99	38	1	2	MSN	6	6	0	1	2	NULL	NULL
100	31	1	4	BSN	4	4	0	1	10	Teacher team organization and communication are very important, and teaching content must be consistent	Simulation equipment configuration, teacher training, curriculum system and simulation
101	40	1	2	BSN	0	1	0	1	4	It’s easy for students to master the teaching content; after all, simulators are not real	Case design, model use
102	27	1	3	other	1	9	1	1	2	High simulation patient simulation is expensive, and the simulator cannot give feedback	It is not easy to use simulation teaching in large classrooms
103	45	1	2	BSN	12	0	0	0	0	NULL	NULL
104	40	1	3	MSN	7	3	0	1	3	NULL	Insufficient simulation tools, incomplete functions, lack of simulation cases
105	28	1	2	other	3	2	1	1	20	NULL	NULL
106	40	1	3	other	10	7	1	0	0	NULL	NULL
107	32	2	3	BSN	3	2	0	1	1	NULL	NULL
108	38	1	3	other	5	2	1	1	50	NULL	NULL
109	27	1	2	BSN	3	0	0	0	0	NULL	NULL
110	35	1	3	other	8	2	1	1	20	The team of simulated teachers is insufficient and the students have a weak foundation	Serious shortage of teachers
111	39	1	2	MSN	8	3	0	1	2	NULL	NULL
112	28	1	2	BSN	1	1	1	1	3	Lack of guidance and feedback skills, case running out of control	Insufficient teaching staff, huge number of students
113	32	1	3	MSN	8	1	0	1	5	lack of experiences	Students’ understanding and adaptation to this teaching mode, their way of thinking
114	45	1	3	MSN	21	2	1	1	1	lack of experiences	Case development, too many students
115	41	1	2	BSN	22	3	1	1	1	Students are more interested but lack experience	I still need to learn to record the disease course on the simulator
116	48	1	2	other	22	5	1	1	30	High requirements for teachers’ clinical experience and a lot of extracurricular energy	Teacher energy, it takes a lot of time after class
117	40	1	2	BSN	8	3	0	1	1	Students have little exposure to simulation teaching and have constant enthusiasm	Case design
118	38	1	2	MSN	10	5	1	1	2	Need continuous training, increase understanding, improve ability and teamwork	Lack of molds, timing
119	30	1	3	BSN	0	0	0	1	5	NULL	NULL
120	31	1	2	other	12	2	1	1	160	Lack of feedback on the implementation of simulation teaching	Limited hours
121	38	1	3	other	3	0	0	1	2	Students are willing to simulate teaching, with few available equipment	Limited hours
122	42	1	2	other	17	10	0	1	10	Some students do not participate	There is not enough time, the content of classroom teaching is too much, there are too many students, and the exam needs
123	44	1	3	other	20	3	1	0	0	Insufficient experience, chaotic classroom organization	Improve efficiency
124	51	1	2	other	29	1	1	1	10	Insufficient experience, lack of teacher team	Case design
125	42	2	2	MSN	18	11	0	1	3	Some students are not fully prepared and the operation cannot be completed smoothly	Students do not have enough mastery of the disease treatment process, teamwork ability
126	33	1	3	BSN	6	2	1	1	0	NULL	NULL
127	28	1	3	BSN	2	1	0	0	0	NULL	NULL
128	34	2	3	BSN	7	0	0	0	0	NULL	NULL
129	30	1	3	other	1	1	1	0	0	NULL	NULL
130	50	1	2	BSN	27	3	1	1	3	NULL	NULL
131	58	1	2	BSN	30	7	1	#NULL!	200	NULL	NULL
132	31	1	3	BSN	8	0.5	0	1	5	NULL	NULL
133	28	1	3	BSN	1	0	0	0	0	NULL	NULL
134	41	1	3	other	12	7	1	1	10	NULL	NULL
135	42	1	3	other	22	5	1	1	6	NULL	NULL
136	39	1	3	MSN	15	5	1	1	10	Time and class are limited, making small classes difficult to establish	Process program control
